# Supplementary material
Source: PubMed Central journal article supplement (PMC8832307)
Supplement: jamaoncol-e217298-s004.pdf [file jamaoncol-e217298-s004.pdf]

## Data Sharing Statement

Vogelzang. Efficacy and Safety of Autologous Dendritic Cell-Based Immunotherapy, Docetaxel, and Prednisone vs Placebo in Patients With Metastatic Castration-Resistant Prostate Cancer. *JAMA Oncol.* Published February 10, 2022.  
doi:10.1001/jamaoncol.2021.7298

### Data

**Data available:** No

### Additional Information

**Explanation for why data not available:** The datasets generated during and/or analyzed during the current trial are not publicly available due to commercial requirements, but are available from the corresponding author on reasonable request (Dr Nicholas Vogelzang, email: [Nicholas.vogelzang@usoncology.com](mailto:Nicholas.vogelzang@usoncology.com))
